# Supplementary material for: Prognostic Value of the B12/CRP Index in Older Systemically Treatable Cancer Patients
Source: MDPI journal article supplement (doi:10.3390/cancers14010169), 2021-12-30
Supplement: s1 [file s1]

# Prognostic Value of the B12/CRP Index in Older Systemically Treatable Cancer Patients

Coline Montegut, Florian Correard, Emilie Nouguerède, Dominique Rey, Thomas Chevalier, Marie Meurer, Jean-Laurent Deville, Marjorie Baciuchka, Vincent Pradel, Laurent Greillier, Patrick Villani and Anne-Laure Couderc

**Table S1.** : Comparison of older patients included in the analysis and those excluded for lack of B12 or CRP dosage or lost to follow-up.

|                                                            | Included ( <i>n</i> = 863) |      | Excluded ( <i>n</i> = 311) |      | <i>p</i> -value |
|------------------------------------------------------------|----------------------------|------|----------------------------|------|-----------------|
|                                                            | <i>n</i>                   | %    | <i>n</i>                   | %    |                 |
| <b>Gender</b>                                              |                            |      |                            |      |                 |
| Women                                                      | 341                        | 39.5 | 117                        | 37.6 | 0.557           |
| Men                                                        | 522                        | 60.5 | 194                        | 62.4 |                 |
| <b>Age (years)</b>                                         |                            |      |                            |      |                 |
| 70-74                                                      | 142                        | 16.5 | 81                         | 26.0 | 0.001           |
| 75-79                                                      | 223                        | 25.8 | 85                         | 27.3 |                 |
| 80-84                                                      | 257                        | 29.8 | 81                         | 26.0 |                 |
| ≥85                                                        | 241                        | 27.9 | 64                         | 20.6 |                 |
| <b>Stage IV cancer</b> ( <i>n</i> = 1158)                  | 486                        | 57.0 | 149                        | 51.1 | 0.014           |
| <b>Cancer type</b> ( <i>n</i> = 1174)                      |                            |      |                            |      |                 |
| Prostate                                                   | 184                        | 21.3 | 42                         | 13.5 | 0.0001          |
| Thoracic                                                   | 183                        | 21.2 | 92                         | 29.6 |                 |
| Gastrointestinal                                           | 131                        | 15.2 | 42                         | 13.5 |                 |
| Breast                                                     | 90                         | 10.4 | 18                         | 5.8  |                 |
| Head and neck                                              | 67                         | 7.8  | 34                         | 10.9 |                 |
| Female reproductive organs                                 | 56                         | 6.5  | 15                         | 4.8  |                 |
| Urological                                                 | 50                         | 5.8  | 25                         | 8.0  |                 |
| Hematological                                              | 51                         | 5.9  | 11                         | 3.5  |                 |
| Skin                                                       | 36                         | 4.2  | 27                         | 8.7  |                 |
| Other                                                      | 15                         | 1.7  | 5                          | 1.6  |                 |
| <b>Autonomy</b> ( <i>n</i> = 1174)                         |                            |      |                            |      |                 |
| Unimpaired ADL-IADL                                        | 323                        | 37.4 | 120                        | 38.6 | 0.801           |
| Impaired ADL or IADL                                       | 224                        | 26.0 | 74                         | 23.8 |                 |
| Impaired ADL and IADL                                      | 313                        | 36.3 | 115                        | 37.0 |                 |
| <b>Cognitive impairment</b> ( <i>n</i> = 1137)             | 538                        | 63.8 | 187                        | 63.6 | 0.948           |
| <b>Mood impairment</b> ( <i>n</i> = 1149)                  | 391                        | 46.3 | 147                        | 48.4 | 0.533           |
| <b>Handgrip Strength</b> <sup>1</sup> ( <i>n</i> = 1137)   | 470                        | 55.9 | 176                        | 59.5 | 0.286           |
| <b>Mobility impairment</b>                                 |                            |      |                            |      |                 |
| TUG (>20s) ( <i>n</i> = 824)                               | 345                        | 41.9 | 152                        | 50.8 | 0.007           |
| OLBT (<5s) ( <i>n</i> = 766)                               | 504                        | 65.8 | 242                        | 86.4 | 0.0001          |
| Gait speed (<0.8m/s) ( <i>n</i> = 762)                     | 390                        | 51.2 | 144                        | 55.4 | 0.241           |
| Falls <sup>2</sup> ( <i>n</i> = 862)                       | 155                        | 18.0 | 65                         | 21.0 | 0.248           |
| <b>Malnutrition</b> <sup>2</sup> ( <i>n</i> = 863)         | 290                        | 33.6 | 126                        | 40.6 | 0.026           |
| <b>Polypharmacy</b> <sup>3</sup> ( <i>n</i> = 862)         | 557                        | 64.6 | 201                        | 64.8 | 0.944           |
| <b>Severe comorbidities</b> <sup>4</sup> ( <i>n</i> = 862) | 466                        | 54.1 | 111                        | 35.7 | 0.0001          |

**Table S2.** Oncological treatment proposal for the 863 patients.

| Treatments                      | <i>n</i> | %    | Treatments                   | <i>n</i> | %    |
|---------------------------------|----------|------|------------------------------|----------|------|
| <b>Chemotherapy (CT)</b>        | 584      | 67.7 | <b>Hormonotherapy (HT)</b>   | 210      | 24.3 |
| Alone                           | 427      | 49.5 | Alone                        | 47       | 5.4  |
| Radio-chemo                     | 115      | 13.3 | Radio-HT                     | 139      | 16.1 |
| Radio-Chemo and hormonotherapy  | 14       | 1.6  | HT and radio-chemo           | 14       | 1.6  |
| CT and/or hormonotherapy (HT)   | 13       | 1.5  | HT and/or CT                 | 13       | 1.5  |
| CT and/or targeted therapy (TT) | 10       | 1.2  | HT and/or TT                 | 10       | 1.2  |
| CT and/or Immunotherapy (IT)    | 5        | 1.5  |                              |          |      |
| <b>Immunotherapy (IT)</b>       | 41       | 4.8  | <b>Targeted therapy (TT)</b> | 51       | 5.9  |
| Alone                           | 33       | 3.8  | Alone                        | 38       | 4.4  |
| IT and/or CT                    | 5        | 1.5  | Radio-TT                     | 3        | 0.3  |
| IT and/or TT                    | 4        | 0.5  | TT and/or CT                 | 5        | 1.5  |
| Radio-IT                        | 4        | 0.5  | TT and/or HT                 | 6        | 0.7  |
| <b>Others</b>                   | 5        | 0.6  | TT and/or IT                 | 4        | 0.5  |

**Table S3.** Association between BCI level and other geriatric characteristics (social isolation, polypharmacy, cognitive disorders, mood impairment, TUG, OLBT, handgrip strength): multinomial logistic regression (Reference group is BCI < 10 000).

|                                 |           | 10 000 < BCI ≤ 40 000 ( <i>n</i> = 147) |             |                 | BCI > 40 000 ( <i>n</i> = 59) |             |                 |
|---------------------------------|-----------|-----------------------------------------|-------------|-----------------|-------------------------------|-------------|-----------------|
| <i>MODEL D (n = 853)</i>        |           | aOR                                     | CI95%       | <i>p</i> -value | aOR                           | CI95%       | <i>p</i> -value |
| <b>Gender</b>                   | Women     | 1                                       |             |                 | 1                             |             |                 |
|                                 | Men       | 1.542                                   | [1.05-2.27] | <b>0.029</b>    | 1.179                         | [0.67-2.06] | 0.565           |
| <b>Age (years)</b>              | 70-74     | 1                                       |             |                 | 1                             |             |                 |
|                                 | 75-79     | 1.513                                   | [0.81-2.81] | 0.192           | 0.583                         | [0.24-1.43] | 0.237           |
|                                 | 80-84     | 1.485                                   | [0.80-2.75] | 0.209           | 1.184                         | [0.55-2.55] | 0.667           |
|                                 | ≥85       | 1.844                                   | [1.00-3.42] | 0.052           | 0.952                         | [0.42-2.17] | 0.952           |
| <b>Stage</b>                    | I-III     | 1                                       |             |                 | 1                             |             |                 |
|                                 | IV        | 2.522                                   | [1.74-366]  | <b>0.0001</b>   | 2.696                         | [0.15-4.71] | <b>0.001</b>    |
| <b>Social isolation</b>         | Absent    | 1                                       |             |                 | 1                             |             |                 |
|                                 | Present   | 1.471                                   | [0.92-2.36] | 0.109           | 1.370                         | [0.68-2.76] | 0.379           |
| <i>MODEL E (n = 852)</i>        |           | aOR                                     | CI95%       | <i>p</i> -value | aOR                           | CI95%       | <i>p</i> -value |
| <b>Gender</b>                   | Women     | 1                                       |             |                 | 1                             |             |                 |
|                                 | Men       | 1.458                                   | [0.99-2.16] | 0.058           | 1.117                         | [0.64-1.96] | 0.700           |
| <b>Age (years)</b>              | 70-74     | 1                                       |             |                 | 1                             |             |                 |
|                                 | 75-79     | 1.415                                   | [0.76-2.65] | 0.278           | 0.549                         | [0.22-1.35] | 0.190           |
|                                 | 80-84     | 1.426                                   | [0.78-2.65] | 0.262           | 1.144                         | [0.53-2.47] | 0.733           |
|                                 | ≥85       | 1.843                                   | [0.99-3.42] | 0.053           | 0.947                         | [0.42-2.16] | 0.896           |
| <b>Stage</b>                    | I-III     | 1                                       |             |                 | 1                             |             |                 |
|                                 | IV        | 2.415                                   | [1.66-3.51] | <b>0.0001</b>   | 2.609                         | [1.50-4.57] | <b>0.001</b>    |
| <b>Polypharmacy<sup>1</sup></b> | < 5 drugs | 1                                       |             |                 | 1                             |             |                 |
|                                 | ≥ 5 drugs | 2.021                                   | [1.32-3.10] | <b>0.01</b>     | 1.777                         | [0.86-3.30] | 0.068           |
| <i>MODEL F (n = 833)</i>        |           | aOR                                     | CI95%       | <i>p</i> -value | aOR                           | CI95%       | <i>p</i> -value |
| <b>Gender</b>                   | Women     | 1                                       |             |                 | 1                             |             |                 |
|                                 | Men       | 1.576                                   | [1.06-2.34] | <b>0.024</b>    | 1.255                         | [0.70-2.26] | 0.450           |
| <b>Age (years)</b>              | 70-74     | 1                                       |             |                 | 1                             |             |                 |
|                                 | 75-79     | 1.182                                   | [0.62-2.24] | 0.607           | 0.401                         | [0.15-1.07] | 0.067           |
|                                 | 80-84     | 1.381                                   | [0.74-2.58] | 0.310           | 1.107                         | [0.49-2.48] | 0.805           |
|                                 | ≥85       | 1.844                                   | [0.99-3.43] | 0.054           | 0.965                         | [0.41-2.28] | 0.936           |
| <b>Stage</b>                    | I-III     | 1                                       |             |                 | 1                             |             |                 |
|                                 | IV        | 2.713                                   | [1.85-3.97] | <b>0.0001</b>   | 2.779                         | [1.54-5.01] | <b>0.001</b>    |
| <b>Cognitive disorders</b>      | Absent    | 1                                       |             |                 | 1                             |             |                 |
|                                 | Present   | 2.034                                   | [1.33-3.10] | <b>0.01</b>     | 2.990                         | [1.49-6.01] | <b>0.002</b>    |
| <i>MODEL G (n = 835)</i>        |           | aOR                                     | CI95%       | <i>p</i> -value | aOR                           | CI95%       | <i>p</i> -value |
| <b>Gender</b>                   | Women     | 1                                       |             |                 | 1                             |             |                 |
|                                 | Men       | 1.648                                   | [1.11-2.16] | <b>0.014</b>    | 1.360                         | [0.76-2.45] | 0.305           |

|                                      |          |            |              |                |            |              |                |
|--------------------------------------|----------|------------|--------------|----------------|------------|--------------|----------------|
| <b>Age (years)</b>                   | 70-74    | 1          |              |                | 1          |              |                |
|                                      | 75-79    | 1.173      | [0.78-2.77]  | 0.230          | 0.734      | [0.29-1.88]  | 0.519          |
|                                      | 80-84    | 1.458      | [0.78-2.72]  | 0.237          | 1.326      | [0.58-3.05]  | 0.507          |
|                                      | ≥85      | 1.874      | [1.00-3.50]  | 0.049          | 1.209      | [0.51-2.89]  | 0.670          |
| <b>Stage</b>                         | I-III    | 1          |              |                | 1          |              |                |
|                                      | IV       | 2.416      | [1.65-3.54]  | <b>0.0001</b>  | 2.476      | [1.39-4.41]  | <b>0.002</b>   |
| <b>Mood impairment</b>               | Absent   | 1          |              |                | 1          |              |                |
|                                      | Present  | 2.201      | [1.50-3.23]  | <b>0.0001</b>  | 2.171      | [1.21-3.88]  | <b>0.009</b>   |
| <b>MODEL H (n = 816)</b>             |          | <b>aOR</b> | <b>CI95%</b> | <b>p-value</b> | <b>aOR</b> | <b>CI95%</b> | <b>p-value</b> |
| <b>Gender</b>                        | Women    | 1          |              |                | 1          |              |                |
|                                      | Men      | 1.628      | [1.09-2.42]  | <b>0.017</b>   | 1.274      | [0.71-2.28]  | 0.414          |
| <b>Age (years)</b>                   | 70-74    | 1          |              |                | 1          |              |                |
|                                      | 75-79    | 1.148      | [0.60-2.19]  | 0.675          | 0.398      | [0.16-2.32]  | 0.057          |
|                                      | 80-84    | 1.317      | [0.70-2.46]  | 0.388          | 1.026      | [0.45-2.32]  | 0.951          |
|                                      | ≥85      | 1.711      | [0.92-3.20]  | 0.092          | 0.851      | [0.36-2.04]  | 0.717          |
| <b>Stage</b>                         | I-III    | 1          |              |                | 1          |              |                |
|                                      | IV       | 2.210      | [1.51-3.24]  | <b>0.0001</b>  | 2.051      | [1.15-3.66]  | <b>0.015</b>   |
| <b>TUG</b>                           | ≤20s     | 1          |              |                | 1          |              |                |
|                                      | >20s     | 1.834      | [1.24-2.72]  | <b>0.002</b>   | 4.345      | [2.34-8.06]  | <b>0.0001</b>  |
| <b>MODEL I (n = 758)</b>             |          | <b>aOR</b> | <b>CI95%</b> | <b>p-value</b> | <b>aOR</b> | <b>CI95%</b> | <b>p-value</b> |
| <b>Gender</b>                        | Women    | 1          |              |                | 1          |              |                |
|                                      | Men      | 1.864      | [1.21-2.87]  | <b>0.005</b>   | 1.605      | [0.87-2.98]  | 0.134          |
| <b>Age (years)</b>                   | 70-74    | 1          |              |                | 1          |              |                |
|                                      | 75-79    | 1.196      | [0.60-2.40]  | 0.615          | 0.362      | [0.14-0.96]  | <b>0.040</b>   |
|                                      | 80-84    | 1.351      | [0.70-2.63]  | 0.375          | 0.754      | [0.32-1.75]  | 0.511          |
|                                      | ≥85      | 1.732      | [0.90-3.35]  | 0.103          | 0.803      | [0.33-1.95]  | 0.629          |
| <b>Stage</b>                         | I-III    | 1          |              |                | 1          |              |                |
|                                      | IV       | 2.429      | [1.62-3.65]  | <b>0.0001</b>  | 2.344      | [1.27-4.31]  | <b>0.006</b>   |
| <b>OLBT</b>                          | ≥ 5 sec  | 1          |              |                | 1          |              |                |
|                                      | <5 sec   | 1.297      | [0.82-2.03]  | 0.257          | 5.026      | [2.05-12.33] | <b>0.0001</b>  |
| <b>MODEL J (n = 831)</b>             |          | <b>aOR</b> | <b>CI95%</b> | <b>p-value</b> | <b>aOR</b> | <b>CI95%</b> | <b>p-value</b> |
| <b>Gender</b>                        | Women    | 1          |              |                | 1          |              |                |
|                                      | Men      | 1.459      | [0.97-2.19]  | 0.068          | 1.304      | [0.72-2.36]  | 0.382          |
| <b>Age (years)</b>                   | 70-74    | 1          |              |                | 1          |              |                |
|                                      | 75-79    | 0.792      | [0.40-1.55]  | 0.494          | 0.256      | [0.09-0.70]  | 0.008          |
|                                      | 80-84    | 1.069      | [0.56-2.03]  | 0.839          | 0.861      | [0.38-1.97]  | 0.723          |
|                                      | ≥85      | 1.604      | [0.85-3.03]  | 0.146          | 0.912      | [0.38-2.17]  | 0.835          |
| <b>Stage</b>                         | I-III    | 1          |              |                | 1          |              |                |
|                                      | IV       | 2.638      | [1.78-3.90]  | <b>0.0001</b>  | 2.868      | [1.59-5.17]  | <b>0.0001</b>  |
| <b>Handgrip strength<sup>2</sup></b> | Normal   | 1          |              |                | 1          |              |                |
|                                      | Impaired | 3.414      | [2.26-5.17]  | <b>0.0001</b>  | 5.261      | [2.79-9.94]  | <b>0.0001</b>  |

BCI: B12/CRP index; TUG: Timed 'Up and Go' test; OLBT: One leg balance test;<sup>1</sup> Polypharmacy define as 5 or more drugs.

<sup>2</sup> Impaired Handgrip Strength was defined as 27kg / men, 16kg / women.

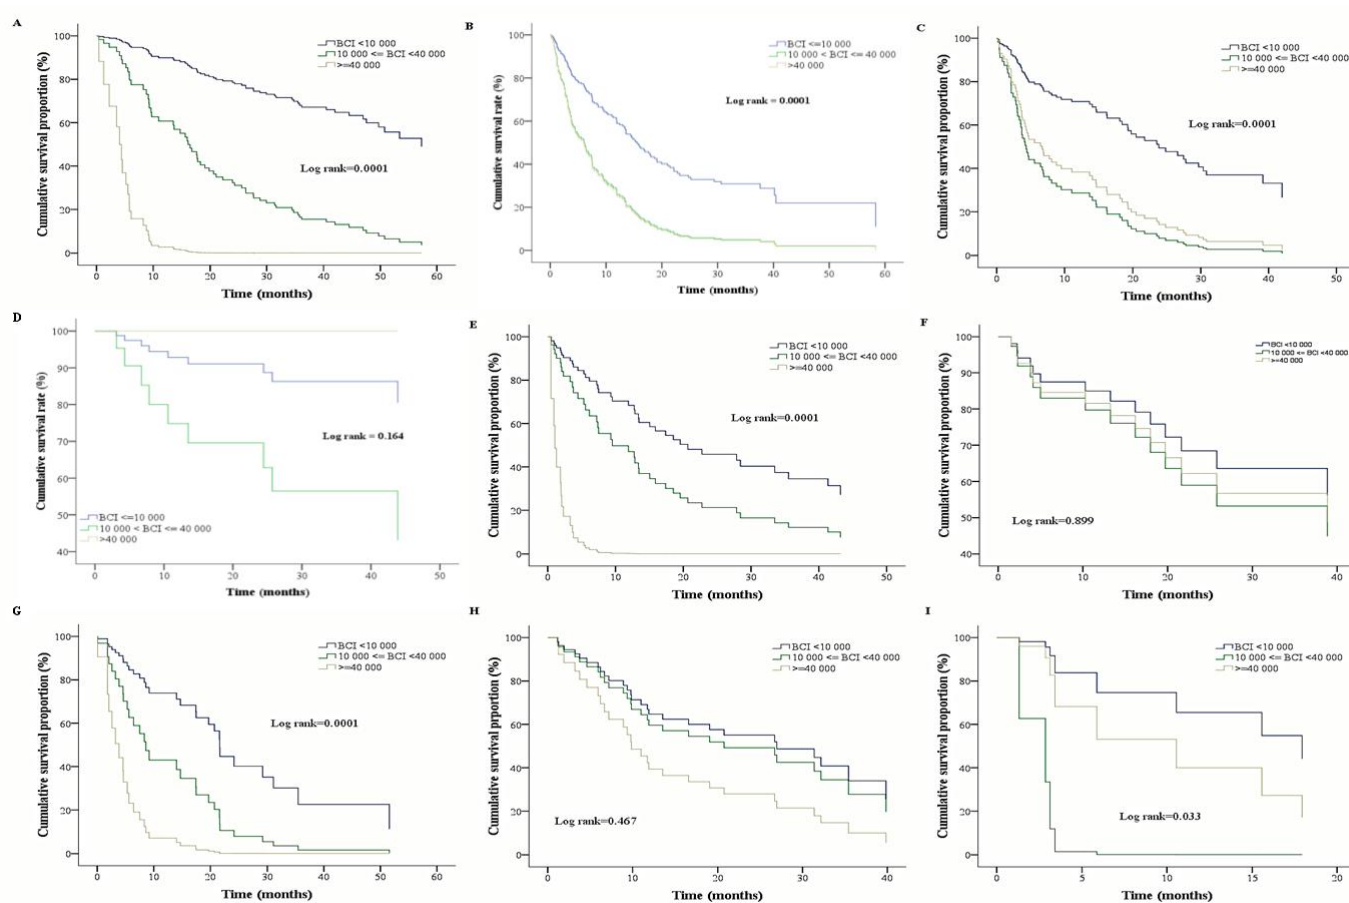

**Figure S1.** Kaplan Meier analysis, overall survival proportion according to BCI groups for each cancer localization (panel A: prostate; B: thoracic; C: gastro-intestinal; D: breast; E: head and neck; F: female reproductive organs; G: urology (bladder and kidney); H: hematological malignancies; I: skin).
